# Supplementary material for: Development of a pH-sensitive functionalized metal organic framework:in vitrostudy for simultaneous delivery of doxorubicin and cyclophosphamide in breast cancer
Source: Royal Society of Chemistry journal article supplement (doi:10.1039/d1ra04591a), 2021-01-01
Supplement: d1ra04591a1.pdf [file d1ra04591a1.pdf]

## Supporting Information

### Development of pH-Sensitive Functionalized Metal Organic Framework: *In-Vitro* Study for Simultaneous Delivery of Doxorubicin and Cyclophosphamide in Breast Cancer

Ragini Singh<sup>a</sup>, Binayak Kumar<sup>a,#</sup>, Ram Krishna Sahu<sup>a,#</sup>, Soni Kumari<sup>a,#</sup>, Chandan Bhogendra Jha<sup>b,#</sup>, Nahar Singh<sup>c</sup>, Rashi Mathur<sup>b</sup>, Suresh T Hedau<sup>a\*</sup>

<sup>a</sup> Division of Molecular Oncology, ICMR-National Institute of Cancer Prevention and Research, I-7, Sector 39, Noida – 201301, Gautam Budha Nagar, U.P., India

<sup>b</sup> Division of Cyclotron and Radiopharmaceutical Sciences, Institute of Nuclear Medicine and Allied Sciences, Defense Research and Development Organization, Brig. S.K. Mazumdar Marg, Delhi 110054, India

<sup>c</sup> CSIR-National Physical Laboratory, New Delhi 110012, India

**Email:** [suresh.hedau@gov.in](mailto:suresh.hedau@gov.in)

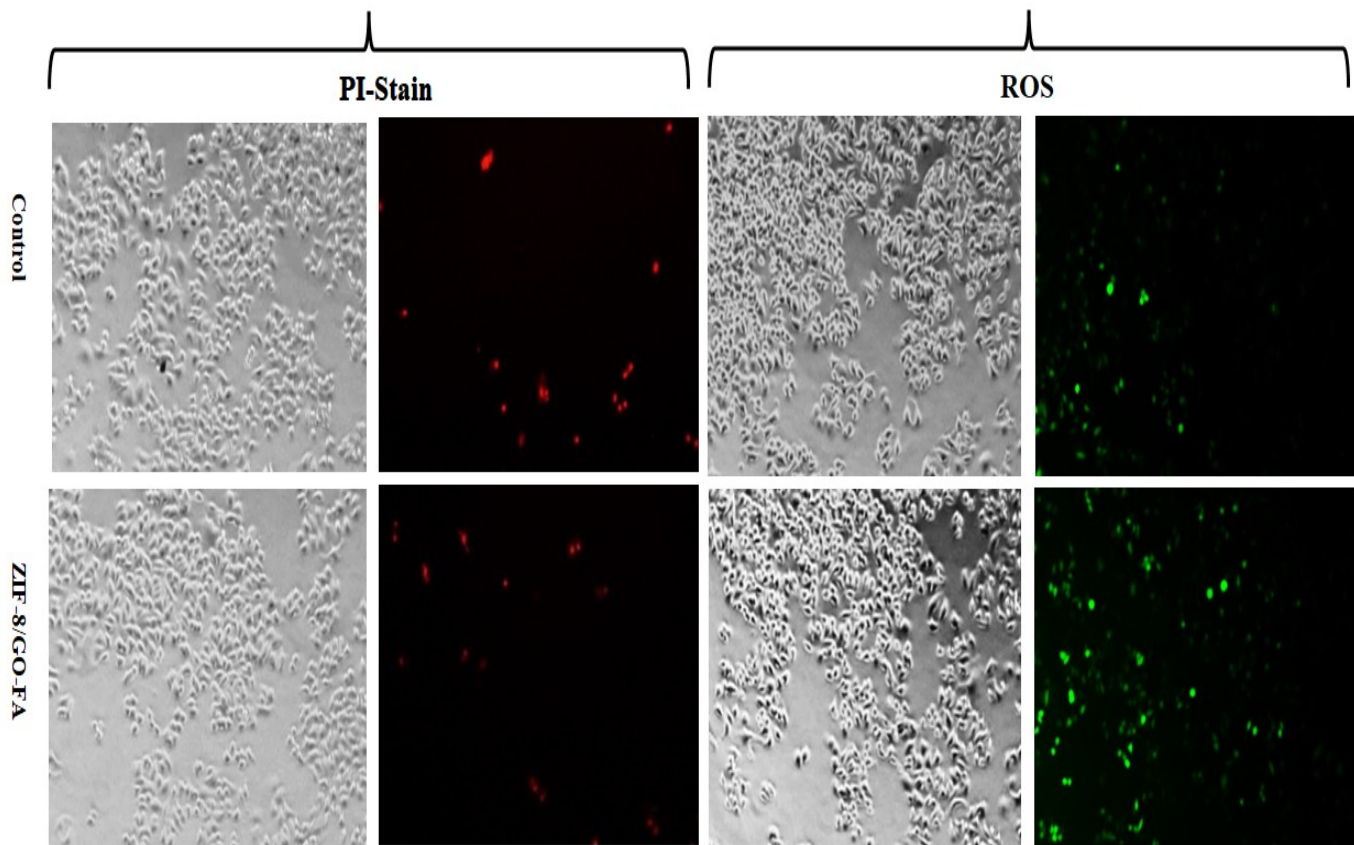

**SI Fig. 1** Fluorescence microscope images of PI-staining and ROS-generation in MCF-7 cells after 24 h incubation with control, ZIF-8/GO-FA, at 20X magnification.

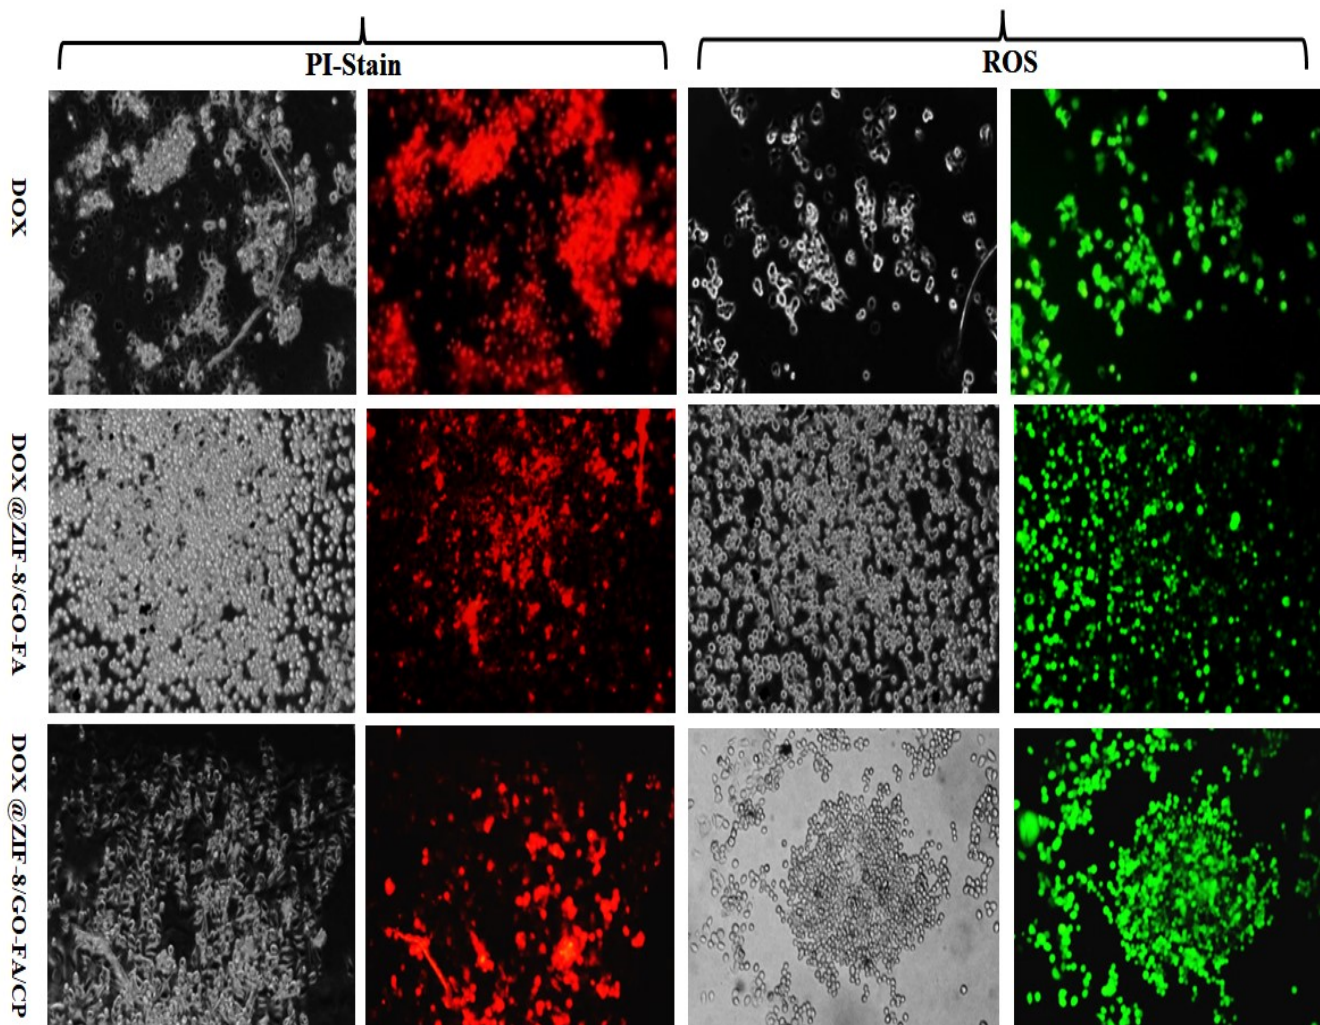

**SI Fig. 2** Fluorescence microscope images of PI-staining and ROS-generation in MCF-7 cells after 24 h incubation with DOX, DOX@ZIF-8/GO-FA, and DOX@ZIF-8/GO-FA/CP at 20X magnification.

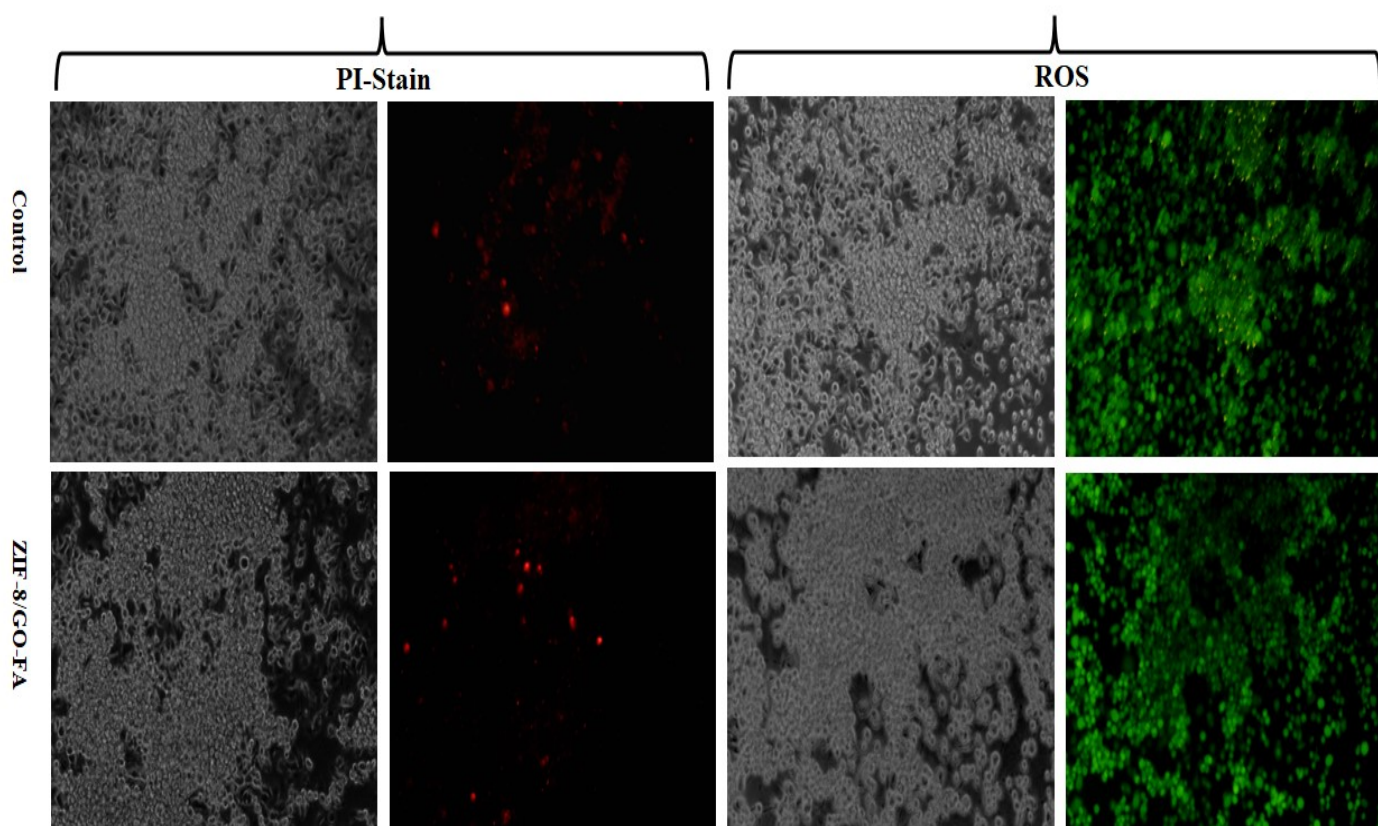

**SI Fig. 3** Fluorescence microscope images of PI-staining and ROS-generation in MDA MB-231 cells after 24 h incubation with control, ZIF-8/GO-FA at 20X magnification.

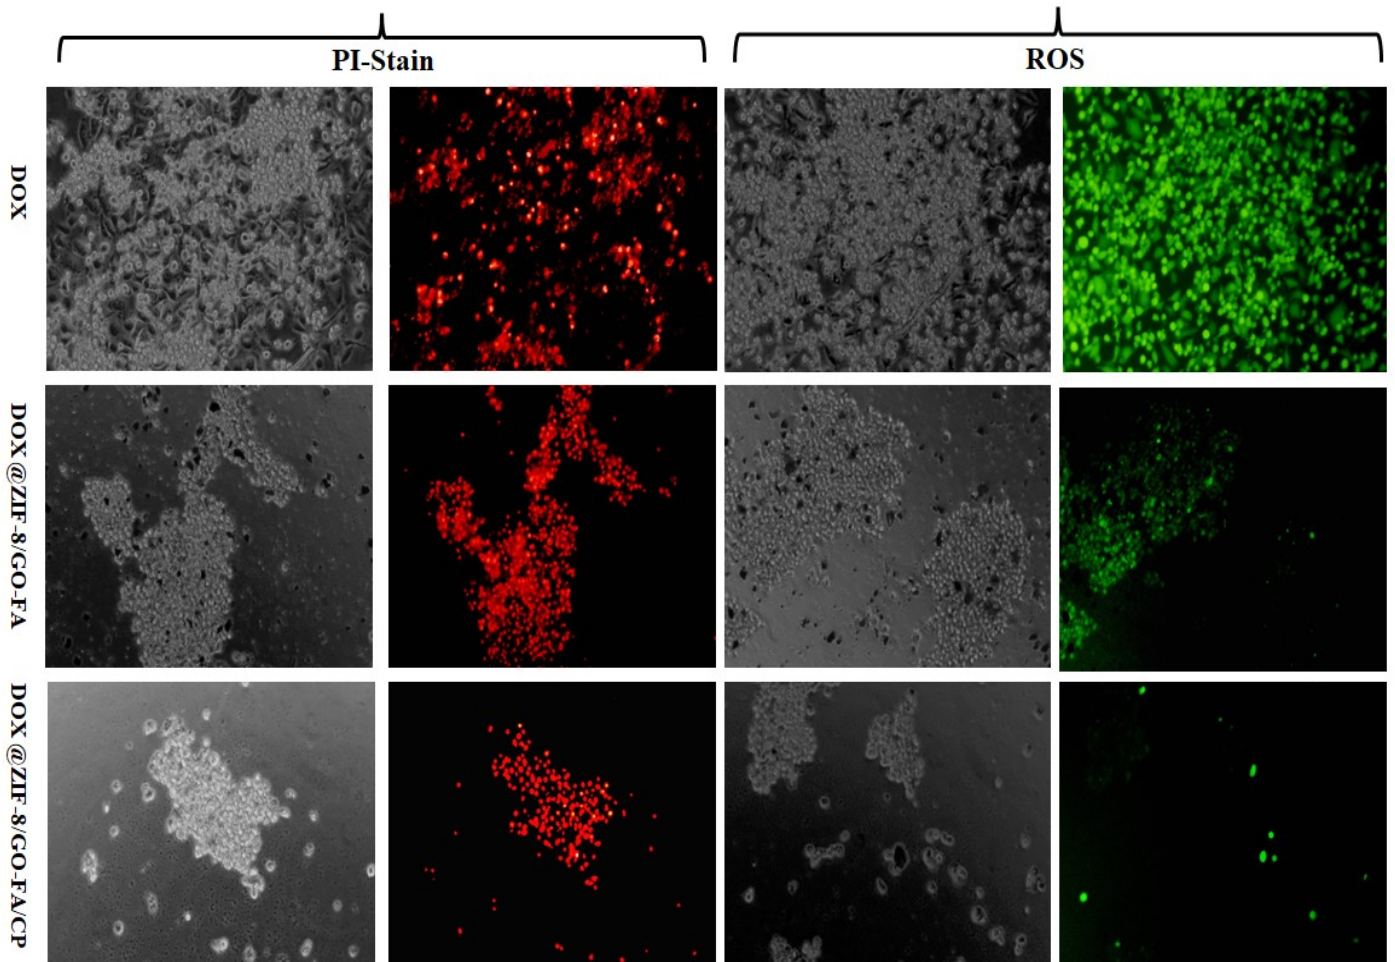

**SI Fig. 4** Fluorescence microscope images of PI-staining and ROS-generation in MDA MB-231 cells after 24 h incubation with DOX, DOX@ZIF-8/GO-FA, and DOX@ZIF-8/GO-FA/CP at 20X magnification.
